# Supplementary material for: Frequency-Based Flood Risk Assessment and Mapping of a Densely Populated Kano City in Sub-Saharan Africa Using MOVE Framework
Source: MDPI journal article supplement (doi:10.3390/w16071013), 2024-03-31
Supplement: s1 [file s1]

# SAMPLE

## Supplementary tables not included in the Paper

Supplementary Table S1a: Challawa vulnerability indicators

| LGA      | Ward         | Population density (E1) | Elevation (E2) | Inundated areas (E3) | Children under 5 (S1) | Elderly above 60 (S2) | Disable people (S3) | Women (S4) | Literacy (R1) | Unemployment (R2) | Poverty (R3) |
|----------|--------------|-------------------------|----------------|----------------------|-----------------------|-----------------------|---------------------|------------|---------------|-------------------|--------------|
| Kumbotso | Kumbotso     | 10817                   | 453            | 8.15                 | 5777                  | 1878                  | 867                 | 13577      | 21867         | 7828              | 15887        |
|          | Unguwar Rimi | 2612                    | 463            | 6.44                 | 5874                  | 1909                  | 881                 | 13803      | 22232         | 7959              | 16153        |
|          | Naibawa      | 4428                    | 460            | 16.33                | 12650                 | 4111                  | 1898                | 29728      | 47882         | 17141             | 34788        |
|          | Garun Gawa   | 6833                    | 464            | 7.16                 | 9673                  | 3144                  | 1451                | 22732      | 36612         | 13107             | 26601        |
|          | Mariri       | 13112                   | 484            | 4.85                 | 10396                 | 3379                  | 1559                | 24429      | 39347         | 14086             | 28588        |
|          | Kureken Sani | 1787                    | 474            | 24.65                | 4867                  | 1582                  | 730                 | 11438      | 18422         | 6595              | 13385        |
|          | Dan Maliki   | 8430                    | 470            | 9.28                 | 16147                 | 5248                  | 2422                | 37946      | 61118         | 21880             | 44405        |
| Tarauni  | Tarauni      | 8667                    | 490            | 0.00                 | 4946                  | 1607                  | 742                 | 11622      | 9051          | 6701              | 13600        |
|          | Gyadi-Gyadi  | 40747                   | 488            | 0.00                 | 2592                  | 842                   | 389                 | 6090       | 4743          | 3512              | 7127         |
|          | Arewa        |                         |                |                      |                       |                       |                     |            |               |                   |              |
|          | Gyadi-Gyadi  | 28181                   | 482            | 0.00                 | 2801                  | 910                   | 420                 | 6583       | 5127          | 3796              | 7703         |
|          | Kudu         |                         |                |                      |                       |                       |                     |            |               |                   |              |
|          | Babban Giji  | 29123                   | 479            | 0.00                 | 11628                 | 3779                  | 1744                | 27325      | 21281         | 15756             | 31977        |
|          | Darmanawa    | 6712                    | 470            | 6.72                 | 7617                  | 2476                  | 1143                | 17900      | 13941         | 10321             | 20947        |
|          | Unguwa Uku   | 57472                   | 481            | 0.00                 | 11053                 | 3592                  | 1658                | 25974      | 20229         | 14976             | 30395        |
|          | Cikin Gari   |                         |                |                      |                       |                       |                     |            |               |                   |              |
|          | Unguwa Uku   | 14675                   | 480            | 0.00                 | 7809                  | 2538                  | 1171                | 18351      | 14292         | 10581             | 21475        |
| KMC      | Kauyen Alu   |                         |                |                      |                       |                       |                     |            |               |                   |              |
|          | Hotoro       | 12765                   | 487            | 0.00                 | 11338                 | 3685                  | 1701                | 26645      | 20752         | 15363             | 31180        |
|          | Daurawa      | 23500                   | 483            | 0.00                 | 4524                  | 1470                  | 679                 | 10632      | 8280          | 6130              | 12442        |
|          | Unguwar Gano | 11856                   | 474            | 0.00                 | 5960                  | 1937                  | 894                 | 14007      | 10909         | 8076              | 16391        |
|          | Sharada      | 23170                   | 484            | 6.49                 | 16671                 | 5418                  | 2501                | 39177      | 51597         | 22589             | 45846        |
|          | Gandu Albasa | 14175                   | 475            | 4.32                 | 15638                 | 5082                  | 2346                | 36750      | 48400         | 21190             | 43005        |
|          | Dan Agundi   | 63443                   | 488            | 0.00                 | 5194                  | 1688                  | 779                 | 12207      | 16077         | 7038              | 14285        |

|       |                |         |     |      |       |      |      |       |        |       |       |
|-------|----------------|---------|-----|------|-------|------|------|-------|--------|-------|-------|
| Gwale | Tudun Wazurchi | 67717   | 488 | 0.00 | 6412  | 2084 | 962  | 15069 | 19846  | 8688  | 17633 |
|       | Kan Karofi     | 425484  | 489 | 0.00 | 9491  | 3085 | 1424 | 22304 | 29375  | 12860 | 26101 |
|       | Dorayi         | 11245   | 482 | 5.60 | 13246 | 4305 | 1987 | 31128 | 59673  | 17948 | 36426 |
|       | Chiranchi      | 1065694 | 489 | 0.00 | 12114 | 3937 | 1817 | 28468 | 54574  | 16415 | 33314 |
|       | Kabuga         | 76641   | 491 | 0.00 | 22547 | 7328 | 3382 | 52985 | 101573 | 30551 | 62004 |
|       | Sani Mai Nagge | 54190   | 495 | 0.00 | 10185 | 3310 | 1528 | 23935 | 45884  | 13801 | 28009 |
|       | Gwale          | 45662   | 484 | 0.00 | 7665  | 2491 | 1150 | 18012 | 34530  | 10386 | 21078 |
|       | Diso           | 242702  | 492 | 0.00 | 7915  | 2572 | 1187 | 18601 | 35658  | 10725 | 21767 |
|       | Galandacchi    | 316836  | 490 | 0.00 | 8529  | 2772 | 1279 | 20044 | 38424  | 11557 | 23455 |

Supplementary Table S1b: Challawa Normalized scores for 100-year return period (Generated from Equations 3 and 4)

| S/N | LGA      | Ward                  | E1     | E2     | E3     | S1     | S2     | S3     | S4     | R1     | R2     | R3     |
|-----|----------|-----------------------|--------|--------|--------|--------|--------|--------|--------|--------|--------|--------|
| 1   | Kumbotso | Kumbotso              | 0.0085 | 0.0000 | 0.3306 | 0.1623 | 0.1597 | 0.1596 | 0.1596 | 0.8232 | 0.1596 | 0.1596 |
| 2   |          | Unguwar Rimi          | 0.0008 | 0.2401 | 0.2614 | 0.1671 | 0.1645 | 0.1644 | 0.1645 | 0.8194 | 0.1645 | 0.1645 |
| 3   |          | Naibawa               | 0.0025 | 0.1743 | 0.6623 | 0.5056 | 0.5041 | 0.5040 | 0.5041 | 0.5545 | 0.5041 | 0.5041 |
| 4   |          | Garun Gawa            | 0.0047 | 0.2707 | 0.2907 | 0.3569 | 0.3549 | 0.3548 | 0.3549 | 0.6709 | 0.3549 | 0.3549 |
| 5   |          | Mariri                | 0.0106 | 0.7441 | 0.1968 | 0.3930 | 0.3911 | 0.3910 | 0.3911 | 0.6426 | 0.3911 | 0.3911 |
| 6   |          | Kureken Sani          | 0.0000 | 0.4969 | 1.0000 | 0.1168 | 0.1141 | 0.1140 | 0.1140 | 0.8587 | 0.1140 | 0.1140 |
| 7   |          | Dan Maliki            | 0.0062 | 0.3995 | 0.3765 | 0.6803 | 0.6793 | 0.6793 | 0.6793 | 0.4178 | 0.6793 | 0.6793 |
| 8   | Tarauni  | Tarauni               | 0.0065 | 0.8825 | 0.0000 | 0.1207 | 0.1180 | 0.1179 | 0.1180 | 0.9555 | 0.1179 | 0.1180 |
| 9   |          | Gyadi-Gyadi Arewa     | 0.0366 | 0.8367 | 0.0000 | 0.0031 | 0.0000 | 0.0000 | 0.0000 | 1.0000 | 0.0000 | 0.0000 |
| 10  |          | Gyadi-Gyadi Kudu      | 0.0248 | 0.6796 | 0.0000 | 0.0136 | 0.0105 | 0.0104 | 0.0105 | 0.9960 | 0.0105 | 0.0105 |
| 11  |          | Babban Giji           | 0.0257 | 0.6085 | 0.0000 | 0.4545 | 0.4528 | 0.4528 | 0.4528 | 0.8292 | 0.4528 | 0.4528 |
| 12  |          | Darmanawa             | 0.0046 | 0.4064 | 0.2726 | 0.2542 | 0.2519 | 0.2518 | 0.2518 | 0.9050 | 0.2518 | 0.2518 |
| 13  |          | Unguwa Uku Cikin Gari | 0.0523 | 0.6637 | 0.0000 | 0.4258 | 0.4240 | 0.4240 | 0.4240 | 0.8401 | 0.4240 | 0.4240 |
| 14  |          | Unguwa Uku Kauyen Alu | 0.0121 | 0.6519 | 0.0000 | 0.2638 | 0.2615 | 0.2614 | 0.2615 | 0.9014 | 0.2614 | 0.2614 |
| 15  |          | Hotoro                | 0.0103 | 0.8199 | 0.0000 | 0.4401 | 0.4383 | 0.4383 | 0.4383 | 0.8347 | 0.4383 | 0.4383 |
| 16  |          | Daurawa               | 0.0204 | 0.7208 | 0.0000 | 0.0997 | 0.0969 | 0.0968 | 0.0969 | 0.9635 | 0.0968 | 0.0968 |
| 17  |          | Unguwar Gano          | 0.0095 | 0.4919 | 0.0000 | 0.1714 | 0.1688 | 0.1687 | 0.1688 | 0.9363 | 0.1688 | 0.1688 |

|    |       |                |        |        |        |        |        |        |        |        |        |        |
|----|-------|----------------|--------|--------|--------|--------|--------|--------|--------|--------|--------|--------|
| 18 | KMC   | Sharada        | 0.0201 | 0.7460 | 0.2634 | 0.7065 | 0.7055 | 0.7055 | 0.7056 | 0.5161 | 0.7056 | 0.7056 |
| 19 |       | Gandu Albasa   | 0.0116 | 0.5276 | 0.1754 | 0.6549 | 0.6538 | 0.6538 | 0.6538 | 0.5491 | 0.6538 | 0.6538 |
| 20 |       | Dan Agundi     | 0.0580 | 0.8214 | 0.0000 | 0.1332 | 0.1305 | 0.1304 | 0.1304 | 0.8830 | 0.1304 | 0.1304 |
| 21 |       | Tudun Wazurchi | 0.0620 | 0.8440 | 0.0000 | 0.1940 | 0.1915 | 0.1914 | 0.1915 | 0.8440 | 0.1914 | 0.1915 |
| 22 |       | Kan Karofi     | 0.3982 | 0.8598 | 0.0000 | 0.3478 | 0.3458 | 0.3457 | 0.3458 | 0.7456 | 0.3457 | 0.3457 |
| 23 | Gwale | Dorayi         | 0.0089 | 0.6815 | 0.2272 | 0.5354 | 0.5339 | 0.5339 | 0.5339 | 0.4327 | 0.5339 | 0.5339 |
| 24 |       | Chiranchi      | 1.0000 | 0.8619 | 0.0000 | 0.4788 | 0.4772 | 0.4772 | 0.4772 | 0.4854 | 0.4772 | 0.4772 |
| 25 |       | Kabuga         | 0.0704 | 0.9157 | 0.0000 | 1.0000 | 1.0000 | 1.0000 | 1.0000 | 0.0000 | 1.0000 | 1.0000 |
| 26 |       | Sani Mai Nagge | 0.0493 | 1.0000 | 0.0000 | 0.3825 | 0.3805 | 0.3805 | 0.3805 | 0.5751 | 0.3805 | 0.3805 |
| 27 |       | Gwale          | 0.0412 | 0.7404 | 0.0000 | 0.2566 | 0.2542 | 0.2542 | 0.2542 | 0.6924 | 0.2542 | 0.2542 |
| 28 |       | Diso           | 0.2264 | 0.9258 | 0.0000 | 0.2691 | 0.2668 | 0.2667 | 0.2668 | 0.6807 | 0.2668 | 0.2668 |
| 29 |       | Galandachi     | 0.2961 | 0.8718 | 0.0000 | 0.2997 | 0.2976 | 0.2975 | 0.2976 | 0.6522 | 0.2975 | 0.2975 |

Supplementary Table S1c: Challawa Indicators Weight for 100 year return period (Generated from Equations 5)

| Indicators           | E1            | E2            | E3            | S1            | S2            | S3            | S4            | R1            | R2            | R3            |
|----------------------|---------------|---------------|---------------|---------------|---------------|---------------|---------------|---------------|---------------|---------------|
| Standard deviation   | 0.1990        | 0.2517        | 0.2346        | 0.2285        | 0.2202        | 0.2292        | 0.2292        | 0.2225        | 0.2292        | 0.2292        |
| 1/Standard deviation | 5.0246        | 3.9736        | 4.2631        | 4.3769        | 4.5417        | 4.3628        | 4.3632        | 4.4942        | 4.3630        | 4.3632        |
| <b>Weight</b>        | <b>0.1139</b> | <b>0.0901</b> | <b>0.0966</b> | <b>0.0992</b> | <b>0.1029</b> | <b>0.0989</b> | <b>0.0989</b> | <b>0.1018</b> | <b>0.0989</b> | <b>0.0989</b> |

Supplementary Table S1d: Challawa Vulnerability index (Generated from Equations 8)

| S/N | LGA      | Ward         | E1     | E2     | E3     | S1     | S2     | S3     | S4     | R1     | R2     | R3     |
|-----|----------|--------------|--------|--------|--------|--------|--------|--------|--------|--------|--------|--------|
| 1   | Kumbotso | Kumbotso     | 0.0010 | 0.0000 | 0.0319 | 0.0161 | 0.0164 | 0.0158 | 0.0158 | 0.0838 | 0.0158 | 0.0158 |
| 2   |          | Unguwar Rimi | 0.0001 | 0.0216 | 0.0253 | 0.0166 | 0.0169 | 0.0163 | 0.0163 | 0.0835 | 0.0163 | 0.0163 |
| 3   |          | Naibawa      | 0.0003 | 0.0157 | 0.0640 | 0.0502 | 0.0519 | 0.0498 | 0.0498 | 0.0565 | 0.0498 | 0.0498 |
| 4   |          | Garun Gawa   | 0.0005 | 0.0244 | 0.0281 | 0.0354 | 0.0365 | 0.0351 | 0.0351 | 0.0683 | 0.0351 | 0.0351 |

|    |         |                       |        |        |        |        |        |        |        |        |        |        |
|----|---------|-----------------------|--------|--------|--------|--------|--------|--------|--------|--------|--------|--------|
| 5  |         | Mariri                | 0.0012 | 0.0670 | 0.0190 | 0.0390 | 0.0403 | 0.0387 | 0.0387 | 0.0655 | 0.0387 | 0.0387 |
| 6  |         | Kureken Sani          | 0.0000 | 0.0447 | 0.0966 | 0.0116 | 0.0117 | 0.0113 | 0.0113 | 0.0875 | 0.0113 | 0.0113 |
| 7  |         | Dan Maliki            | 0.0007 | 0.0360 | 0.0364 | 0.0675 | 0.0699 | 0.0672 | 0.0672 | 0.0426 | 0.0672 | 0.0672 |
| 8  | Tarauni | Tarauni               | 0.0007 | 0.0795 | 0.0000 | 0.0120 | 0.0121 | 0.0117 | 0.0117 | 0.0973 | 0.0117 | 0.0117 |
| 9  |         | Gyadi-Gyadi Arewa     | 0.0042 | 0.0753 | 0.0000 | 0.0003 | 0.0000 | 0.0000 | 0.0000 | 0.1018 | 0.0000 | 0.0000 |
| 10 |         | Gyadi-Gyadi Kudu      | 0.0028 | 0.0612 | 0.0000 | 0.0013 | 0.0011 | 0.0010 | 0.0010 | 0.1014 | 0.0010 | 0.0010 |
| 11 |         | Babban Giji           | 0.0029 | 0.0548 | 0.0000 | 0.0451 | 0.0466 | 0.0448 | 0.0448 | 0.0845 | 0.0448 | 0.0448 |
| 12 |         | Darmanawa             | 0.0005 | 0.0366 | 0.0263 | 0.0252 | 0.0259 | 0.0249 | 0.0249 | 0.0922 | 0.0249 | 0.0249 |
| 13 |         | Unguwa Uku Cikin Gari | 0.0060 | 0.0598 | 0.0000 | 0.0422 | 0.0436 | 0.0419 | 0.0419 | 0.0856 | 0.0419 | 0.0419 |
| 14 |         | Unguwa Uku Kauyen Alu | 0.0014 | 0.0587 | 0.0000 | 0.0262 | 0.0269 | 0.0258 | 0.0259 | 0.0918 | 0.0258 | 0.0259 |
| 15 |         | Hotoro                | 0.0012 | 0.0738 | 0.0000 | 0.0437 | 0.0451 | 0.0433 | 0.0433 | 0.0850 | 0.0433 | 0.0433 |
| 16 |         | Daurawa               | 0.0023 | 0.0649 | 0.0000 | 0.0099 | 0.0100 | 0.0096 | 0.0096 | 0.0981 | 0.0096 | 0.0096 |
| 17 |         | Ungwar Gano           | 0.0011 | 0.0443 | 0.0000 | 0.0170 | 0.0174 | 0.0167 | 0.0167 | 0.0954 | 0.0167 | 0.0167 |
| 18 | KMC     | Sharada               | 0.0023 | 0.0672 | 0.0255 | 0.0701 | 0.0726 | 0.0698 | 0.0698 | 0.0526 | 0.0698 | 0.0698 |
| 19 |         | Gandu Albasa          | 0.0013 | 0.0475 | 0.0169 | 0.0650 | 0.0673 | 0.0646 | 0.0646 | 0.0559 | 0.0646 | 0.0646 |
| 20 |         | Dan Agundi            | 0.0066 | 0.0740 | 0.0000 | 0.0132 | 0.0134 | 0.0129 | 0.0129 | 0.0899 | 0.0129 | 0.0129 |
| 21 |         | Tudun Wazurchi        | 0.0071 | 0.0760 | 0.0000 | 0.0192 | 0.0197 | 0.0189 | 0.0189 | 0.0860 | 0.0189 | 0.0189 |
| 22 |         | Kan Karofi            | 0.0453 | 0.0774 | 0.0000 | 0.0345 | 0.0356 | 0.0342 | 0.0342 | 0.0759 | 0.0342 | 0.0342 |
| 23 | Gwale   | Dorayi                | 0.0010 | 0.0614 | 0.0220 | 0.0531 | 0.0550 | 0.0528 | 0.0528 | 0.0441 | 0.0528 | 0.0528 |
| 24 |         | Chiranchi             | 0.1139 | 0.0776 | 0.0000 | 0.0475 | 0.0491 | 0.0472 | 0.0472 | 0.0494 | 0.0472 | 0.0472 |
| 25 |         | Kabuga                | 0.0080 | 0.0825 | 0.0000 | 0.0992 | 0.1029 | 0.0989 | 0.0989 | 0.0000 | 0.0989 | 0.0989 |
| 26 |         | Sani Mai Nagge        | 0.0056 | 0.0901 | 0.0000 | 0.0379 | 0.0392 | 0.0376 | 0.0376 | 0.0586 | 0.0376 | 0.0376 |
| 27 |         | Gwale                 | 0.0047 | 0.0667 | 0.0000 | 0.0254 | 0.0262 | 0.0251 | 0.0251 | 0.0705 | 0.0251 | 0.0251 |
| 28 |         | Diso                  | 0.0258 | 0.0834 | 0.0000 | 0.0267 | 0.0275 | 0.0264 | 0.0264 | 0.0693 | 0.0264 | 0.0264 |
| 29 |         | Galandachi            | 0.0337 | 0.0785 | 0.0000 | 0.0297 | 0.0306 | 0.0294 | 0.0294 | 0.0664 | 0.0294 | 0.0294 |

Supplementary Table S1e: Challawa aggregated vulnerability index for different return periods

| Ward                  | VI 100yr | VI 50yr | VI 25yr | VI 10yr | VI 5yr | VI 2yr |
|-----------------------|----------|---------|---------|---------|--------|--------|
| Babban Giji           | 0.412953 | 0.3840  | 0.3648  | 0.3430  | 0.3138 | 0.2783 |
| Chiranchi             | 0.526257 | 0.3211  | 0.3051  | 0.2868  | 0.2624 | 0.2327 |
| Dan Agundi            | 0.248708 | 0.2313  | 0.2197  | 0.2065  | 0.1890 | 0.1676 |
| Dan Maliki            | 0.521677 | 0.4852  | 0.4609  | 0.4332  | 0.3964 | 0.3516 |
| Dandago               | 0.0000   | 0.0000  | 0.0000  | 0.0000  | 0.0000 | 0.0000 |
| Darmanawa             | 0.306363 | 0.2849  | 0.2707  | 0.2544  | 0.2328 | 0.2065 |
| Daurawa               | 0.223513 | 0.2079  | 0.1975  | 0.1856  | 0.1698 | 0.1507 |
| Diso                  | 0.338139 | 0.3145  | 0.2987  | 0.2808  | 0.2570 | 0.2279 |
| Dorayi                | 0.447619 | 0.4868  | 0.4625  | 0.4347  | 0.3978 | 0.3528 |
| Galandacchi           | 0.356676 | 0.3317  | 0.3151  | 0.2962  | 0.2710 | 0.2404 |
| Gandu Albasa          | 0.512524 | 0.4217  | 0.4006  | 0.3766  | 0.3446 | 0.3056 |
| Garun Gawa            | 0.333592 | 0.5052  | 0.4799  | 0.4512  | 0.4128 | 0.3662 |
| giginyu               | 0.0000   | 0.0000  | 0.0000  | 0.0000  | 0.0000 | 0.0000 |
| Gwale                 | 0.294043 | 0.2735  | 0.2598  | 0.2442  | 0.2234 | 0.1982 |
| Gyadi-Gyadi Arewa     | 0.181672 | 0.1690  | 0.1605  | 0.1509  | 0.1381 | 0.1225 |
| Gyadi-Gyadi Kudu      | 0.17204  | 0.1600  | 0.1520  | 0.1429  | 0.1307 | 0.1160 |
| Hotoro                | 0.42213  | 0.3926  | 0.3730  | 0.3506  | 0.3208 | 0.2845 |
| Hotoro South          | 0.0000   | 0.0000  | 0.0000  | 0.0000  | 0.0000 | 0.0000 |
| Kabuga                | 0.688088 | 0.3939  | 0.3742  | 0.3517  | 0.3218 | 0.2855 |
| Kan Karofi            | 0.405534 | 0.3771  | 0.3583  | 0.3368  | 0.3082 | 0.2733 |
| Kumbotso              | 0.212405 | 0.4969  | 0.4720  | 0.4437  | 0.4060 | 0.3601 |
| Kureken Sani          | 0.297236 | 0.6399  | 0.6079  | 0.5714  | 0.5229 | 0.4638 |
| Mariri                | 0.386576 | 0.3595  | 0.3415  | 0.3210  | 0.2938 | 0.2606 |
| Naibawa               | 0.437819 | 0.4868  | 0.4625  | 0.4347  | 0.3978 | 0.3528 |
| Sani Mai Nagge        | 0.381828 | 0.3551  | 0.3373  | 0.3171  | 0.2902 | 0.2574 |
| Sharada               | 0.569219 | 0.5294  | 0.5029  | 0.4727  | 0.4325 | 0.3837 |
| Tarauni               | 0.248281 | 0.2309  | 0.2194  | 0.2062  | 0.1887 | 0.1673 |
| Tudun Wazurchi        | 0.283685 | 0.2638  | 0.2506  | 0.2356  | 0.2156 | 0.1912 |
| Unguwa Uku Cikin Gari | 0.404852 | 0.3765  | 0.3577  | 0.3362  | 0.3076 | 0.2729 |
| Unguwa Uku Kauyen Alu | 0.308355 | 0.2868  | 0.2724  | 0.2561  | 0.2343 | 0.2078 |
| Unguwar Gano          | 0.241878 | 0.2249  | 0.2137  | 0.2009  | 0.1838 | 0.1630 |
| Unguwar Rimi          | 0.22896  | 0.4052  | 0.3849  | 0.3618  | 0.3311 | 0.2937 |
